# Supplementary material
Source: MDPI journal article supplement (https://www.mdpi.com/2673-9984/2/1/21)

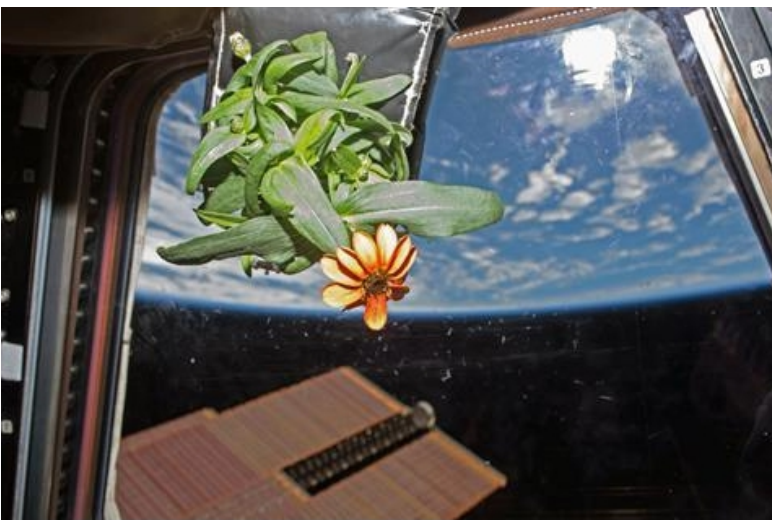

**1<sup>st</sup> Electronic  
Conference on  
Universe – Sciforum  
(ECU 2021)**

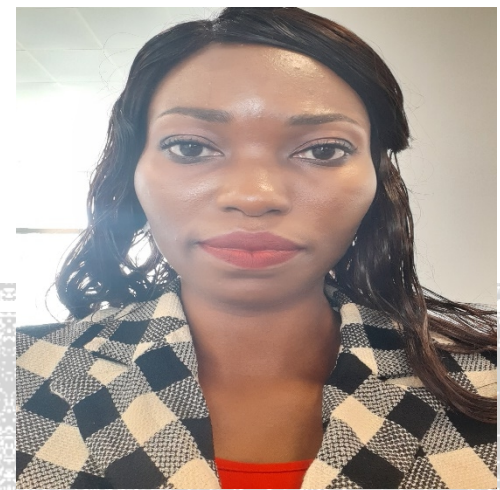

# **GRAVITY VARIATION EFFECTS ON THE GROWTH OF MAIZE SHOOTS**

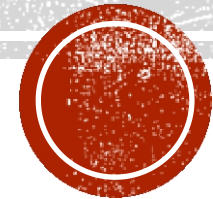

**BY:**

**Funmilola Oluwafemi**

**Engineering and Space Systems Department,  
National Space Research and Development Agency  
(NASRDA), Abuja, Nigeria.**

# **PRESENTATION OUTLINE**

- 1. Introduction**
- 2. Microgravity Research**
- 3. Selected Crop for Microgravity Simulations**
- 4. Importance of Plants Shoot**
- 5. Aim**
- 6. Experiment**
- 7. The Three Samples**
- 8. Results**
- 9. Discussion**
- 10. Future Work**
- 11. Conclusion**
- 12. References**

# INTRODUCTION

- **Gravity** is always present on earth.
- **Microgravity** is a characteristic of the outer space environment.
- **On-board spaceflight microgravity-experiments** are rare and expensive.
- **Similar experiments** are now being conducted on the earth surface using microgravity equipment that provides simulated microgravity conditions; such as the Clinostats.
- A **Clinostat device** uses rotation to negate gravitational-pull effects on plant growth and development.
- A **two-dimensional (2-D) Clinostat** has a single rotational axis, which runs perpendicular to the direction of the gravity vector. It operates with respect to speed and direction of the rotation.

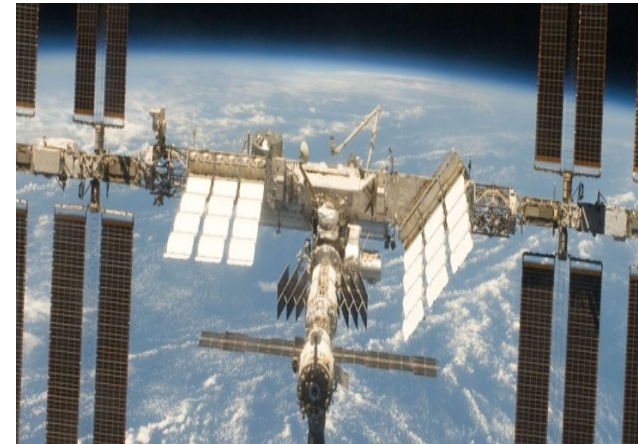

**International Space Station (ISS)**

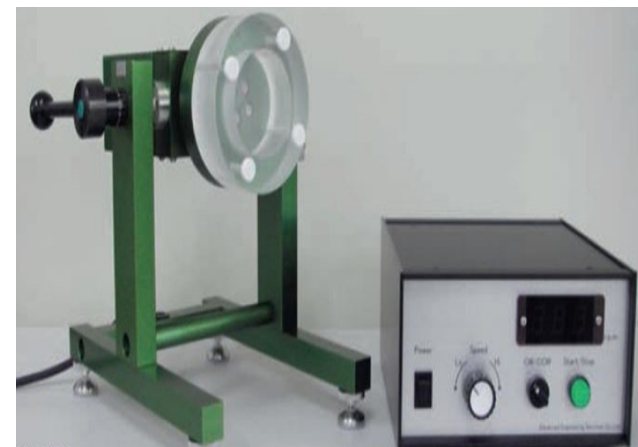

**2-D Clinostat**

# MICROGRAVITY RESEARCH

- **Microgravity research gives insight on the new orientation of plants** after been impacted by microgravity.
- These effects of microgravity on plants sometime **gives definite changes which could be beneficial.**
- These researches are therefore called **gravity variation researches** as the normal-earth-gravity (1G) and microgravity ( $\mu\text{g}$ ) platforms are possible variations for experimental purposes.

# SELECTED CROP FOR MICROGRAVITY SIMULATIONS

- ❖ The selected crop is **maize**.
- ❖ It is selected because of its **nutritional and economical values**.
- ❖ It is **number one cereal in Africa and number two cereal in the world**.

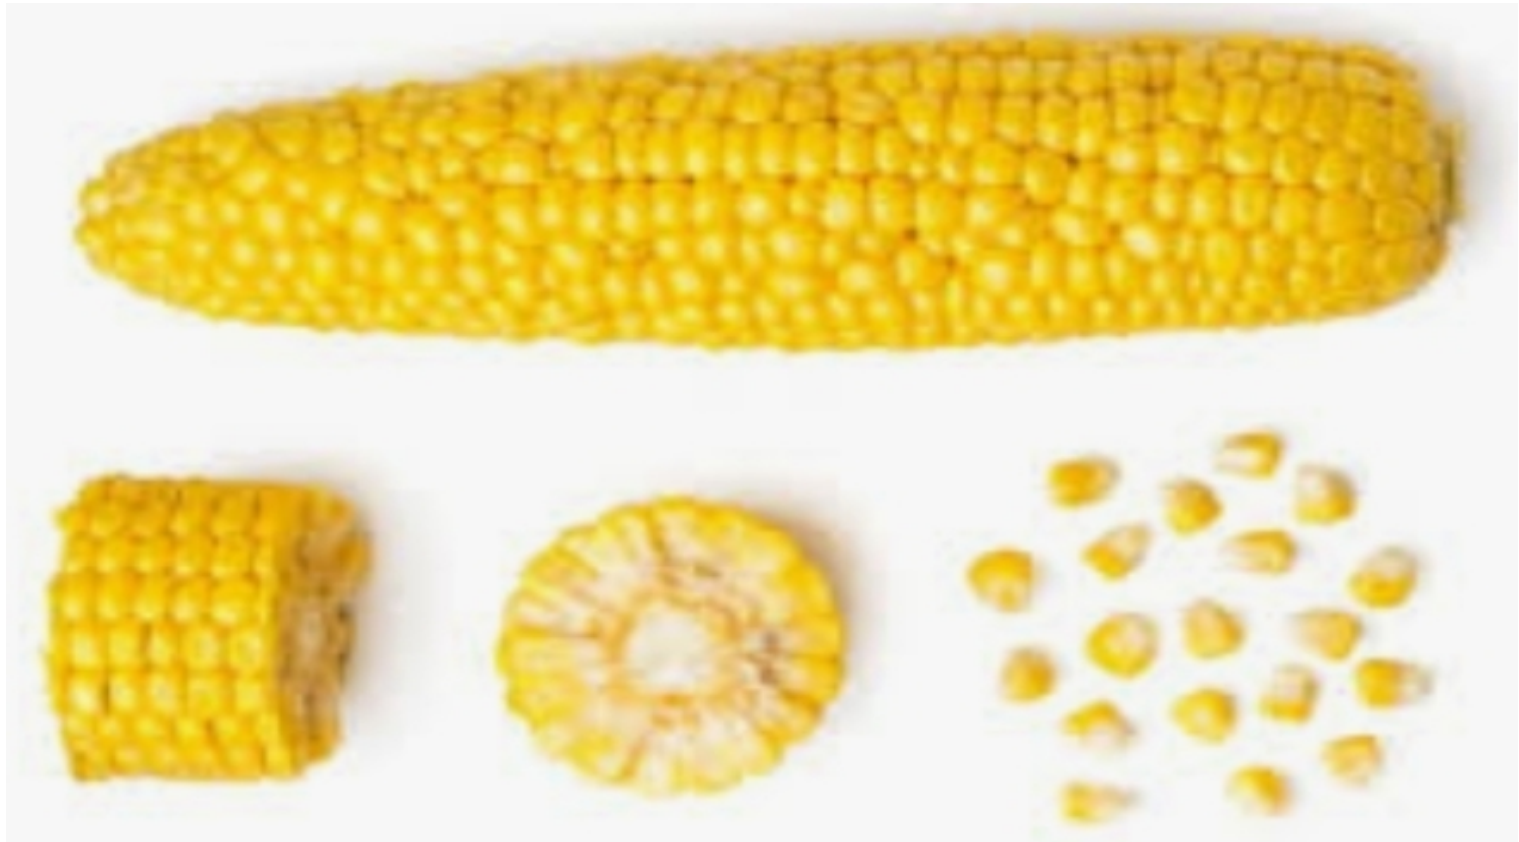

Corn (*Zea mays*)



# IMPORTANCE OF PLANTS SHOOT

- ❖ In the experiment, the **shoots** of the plants were the **focus**.
- ❖ The shoots of the seedlings were studied because plant shoot **physiology** is important for **gravi-responses**. If the shoot of a plant is unable to perform or function, then so will the plant not be able to function.

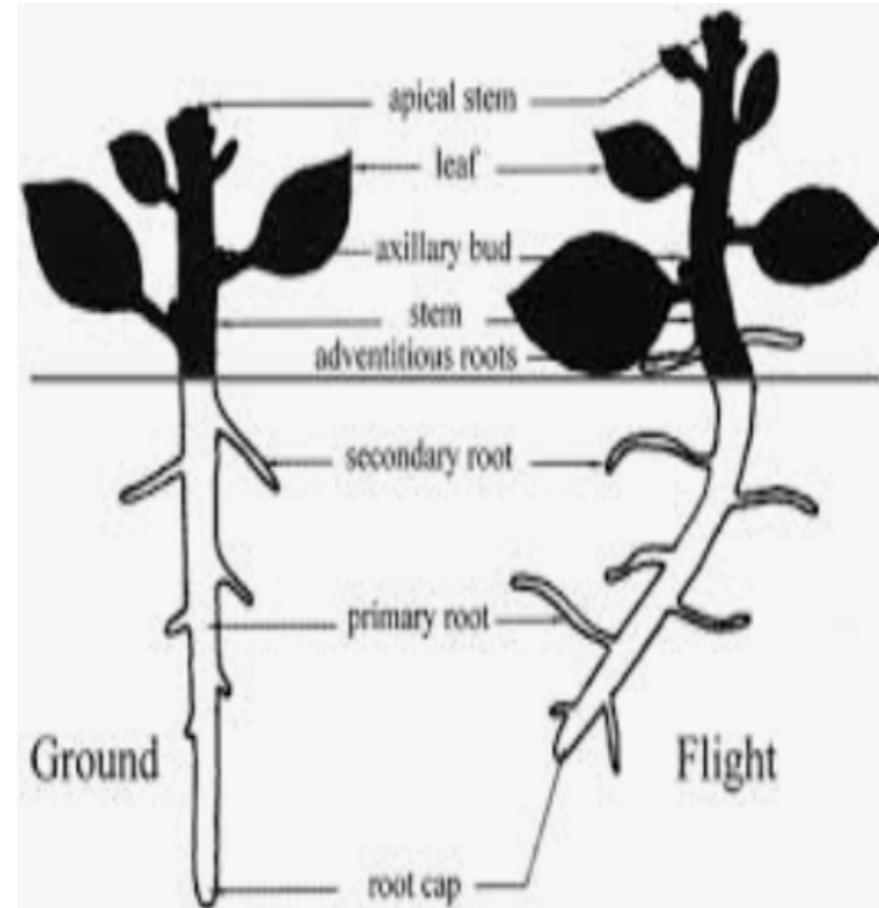

# AIM

- ❖ The aim of this study was to understand the impact of gravity on maize growth to determine what its orientation will be in space, where there is microgravity; as well as to identify the underlying mechanisms and to conduct observational experiments (by measurement of the curvature angles and growth-rates of shoots using ImageJ software) with respect to gravitropic reactions with the shoots grown of maize under simulated microgravity environment and comparing them with those of control experiments.

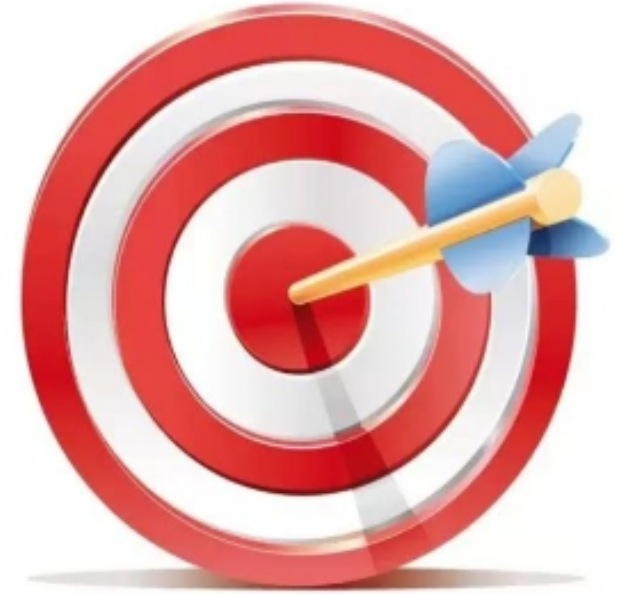

# EXPERIMENT

- ❖ The steps necessary for preparing an experiment using the Clinostat with plants include:
  - preparation of **the substrate for seeds** in petri dishes.
  - **planting of seeds** into the substrate.
  - **cultivation inside a wet chamber.**
  - **Ascertain that gravity is active** in the laboratory (**90°-turned sample**).
  - **Placement of the seeds on the Clinostat** (**source of simulated microgravity**).
  - The **possible experimental variables** are humidity, temperature and light while on the Clinostat, **rotation-speed, rotational-axis angle and rotation-direction** are the specific experimental variables.
  - possible methods for getting results with a further analysis of observed gravi-responses to compare the effect of **simulated microgravity on grown roots of plants** to those under **gravity response**.
- Observations were made for 4 hours during the experiments on the samples and a **wide range of observational and measurement tools** (such as imageJ) were used.

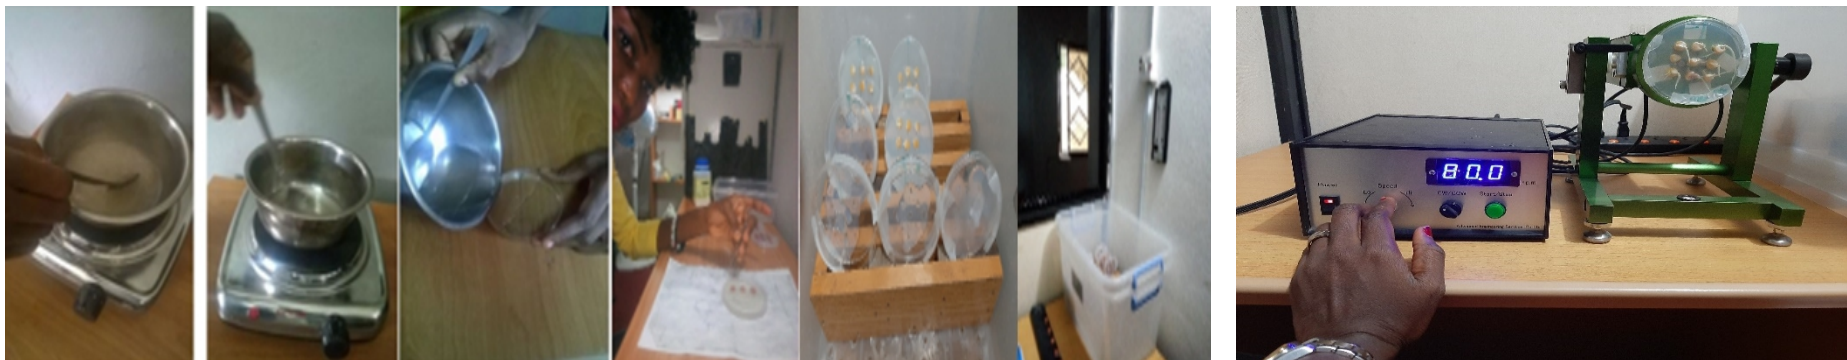



# THE THREE SAMPLES

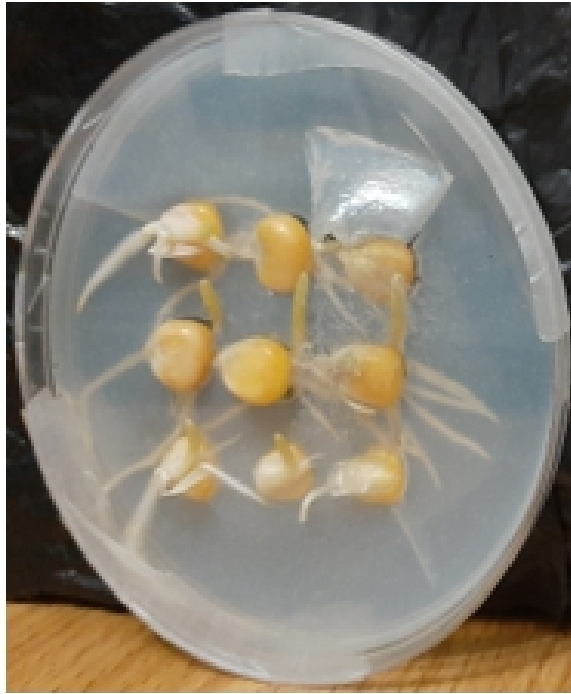

(a)

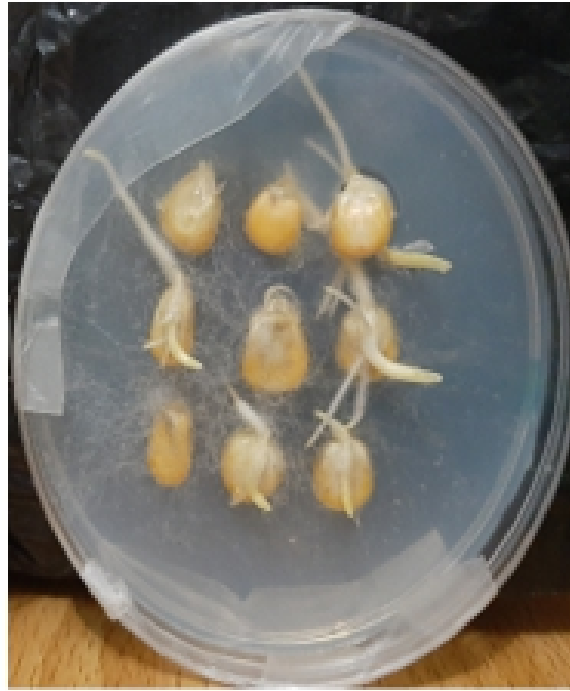

(b)

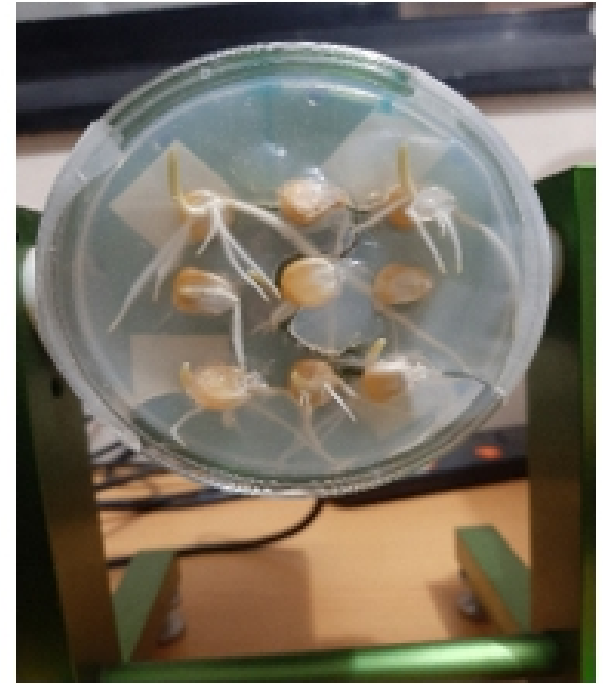

(c)

The three samples: (a) 1G-control sample; (b) 90°-turned sample; (c) Clinorotated sample.

# RESULT

## Growth-rate

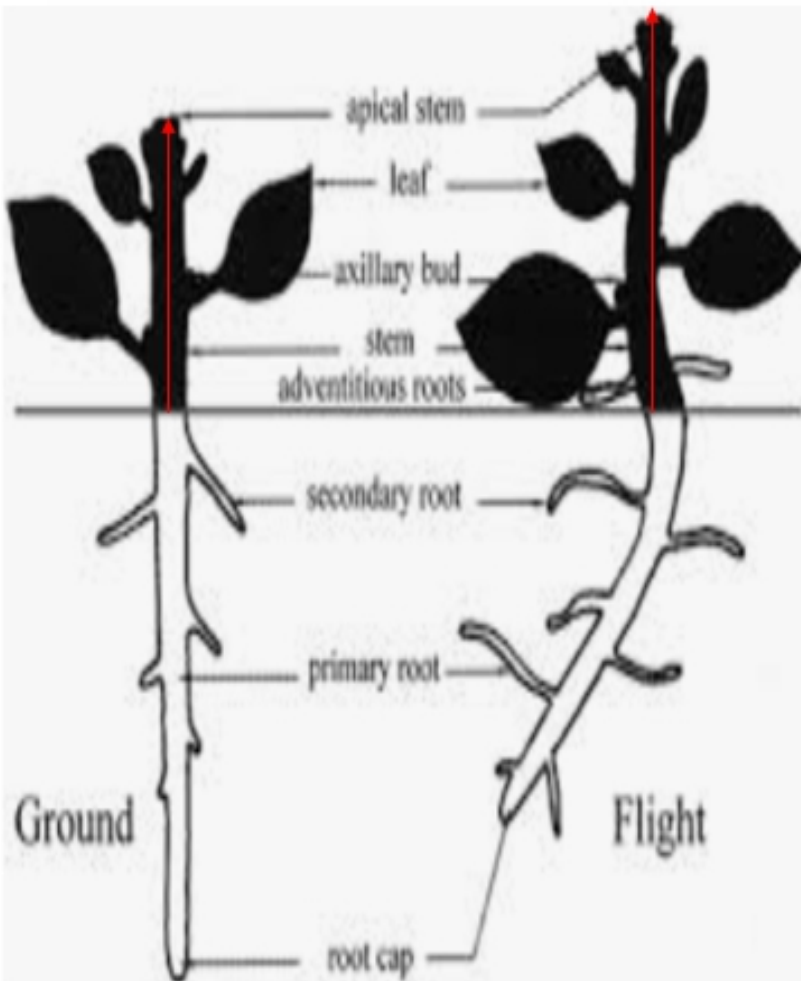

The average growth-rate of the shoots for the 1G-control sample was 1.25cm/hr while that of the clinorotated sample was 1.26cm/hr.

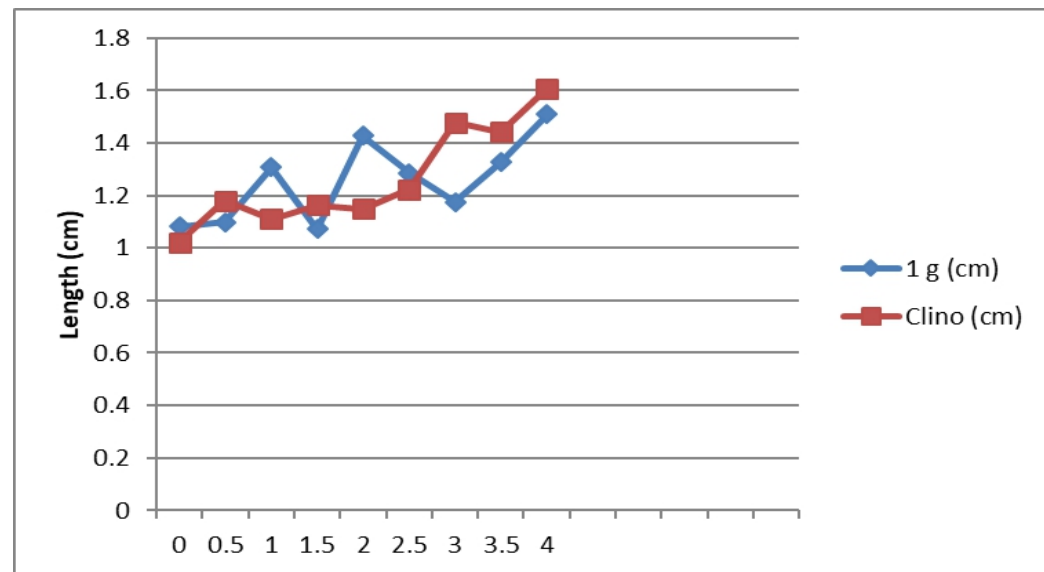

Shoot length of the 1G-control and the clinorotated samples of maize seedlings.

# RESULT CONT'D

## Shoot curvature

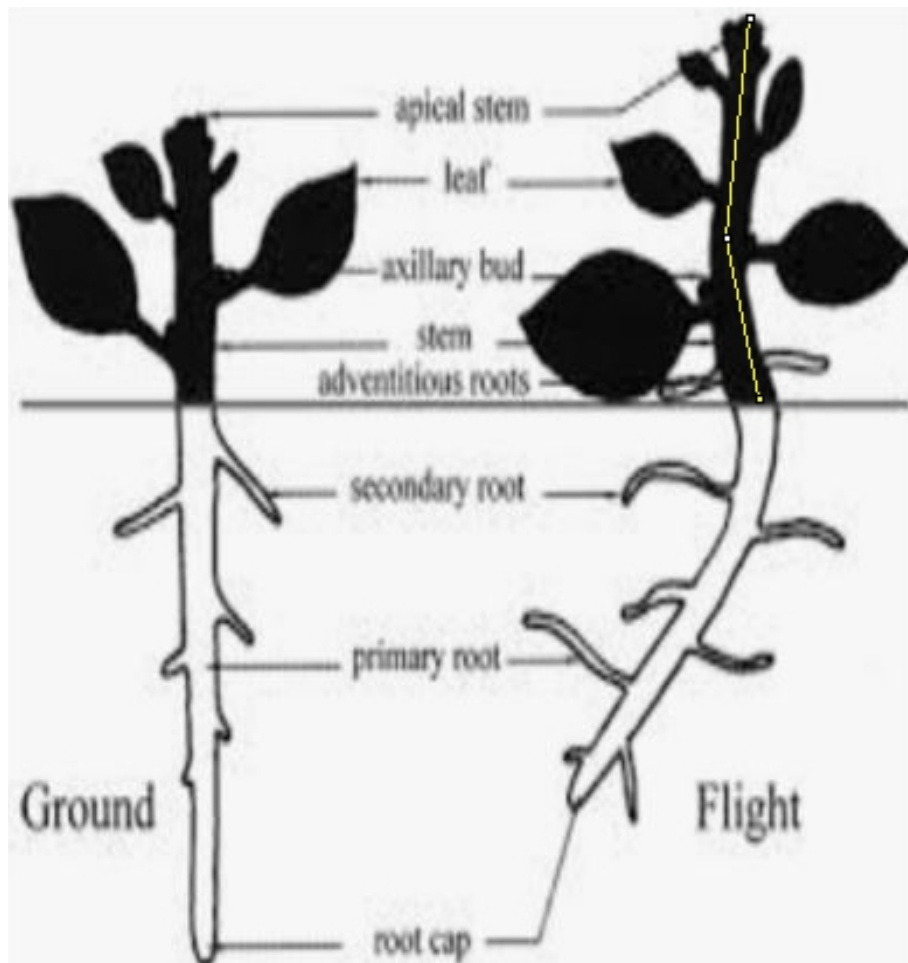

The average angular rate of the shoot bending for the 90°-turned was 55.49°/hr while that of the clinorotated was 50.77°/hr.

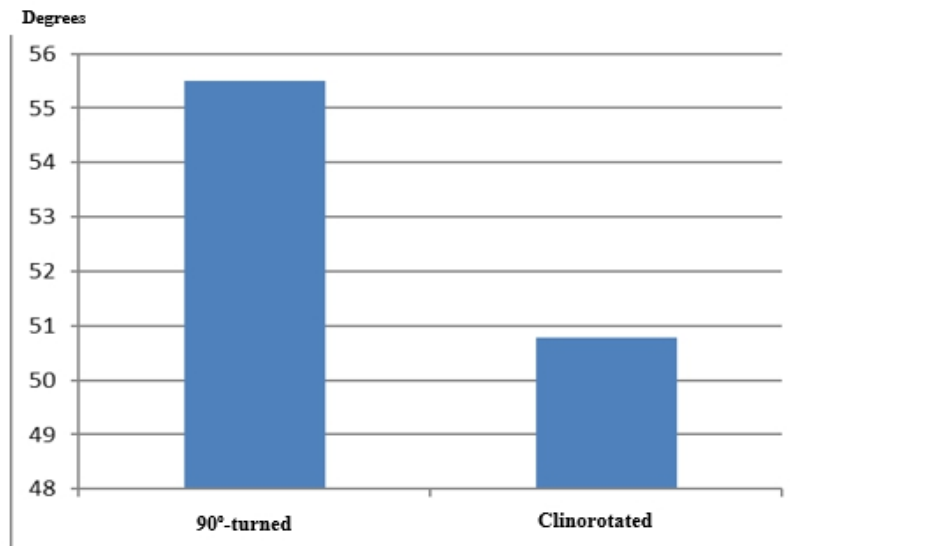

Shoot curvature of the 90°-turned and the clinorotated samples of maize seedlings.

# DISCUSSION

- ❖ **The shoot length enhancement have physiological basis.**
- ❖ **It can be deduced that there could be changes in the vascular structure of the shoots as a result of the orientation of microfibrils and their assembly in developing vessels perturbed by simulated microgravity.**
- ❖ **The image of the 90°-turned sample showed that the shoots started bending in the direction of gravity after the petri-dish was turned by 90°. This is an evidence of gravitropism of the shoots; this indicates a positive response to simulated microgravity.**
- ❖ **Therefore, maize has a promising result with the use of Clinostat simulated microgravity model.**

# FUTURE WORK

This study is only on the shoot morphology (curvature and length); further research work is proposed on the plant photosynthesis, respiration, transpiration, and gene expression. All these involve the flow of information and communications within the underlying cells.

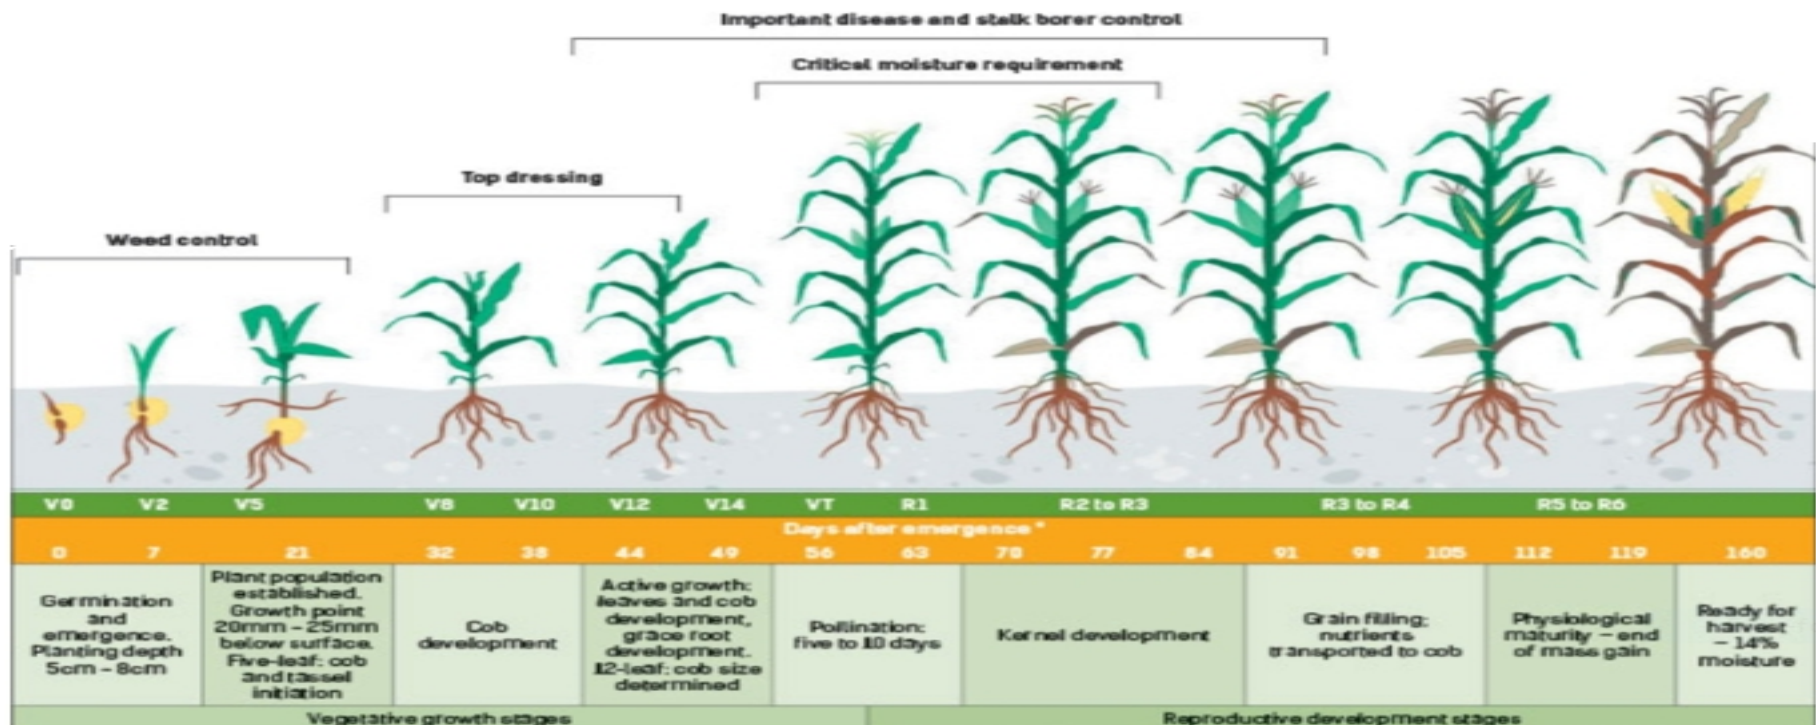

**Developmental vegetative stages of corn**



# CONCLUSION

- Plants account for the majority of human food. Therefore, **improving the growth-rate status of plants will help increase the crop's yield** which is an important factor to feeding the world's growing population.
- **In this study, simulated microgravity using 2-D Clinostat was able to cause an increase in the shoot growth-rate of maize as a response from gravity to simulated microgravity.**
- Therefore, simulated microgravity of Clinostat is proposed to have beneficial effects on the in-built structure of seedlings before they are transplanted unto the field to produce **better product yields and higher nutritional qualities**. Thus, “simulated space stressing” of plant at the early stage of seedling could be advantageous.

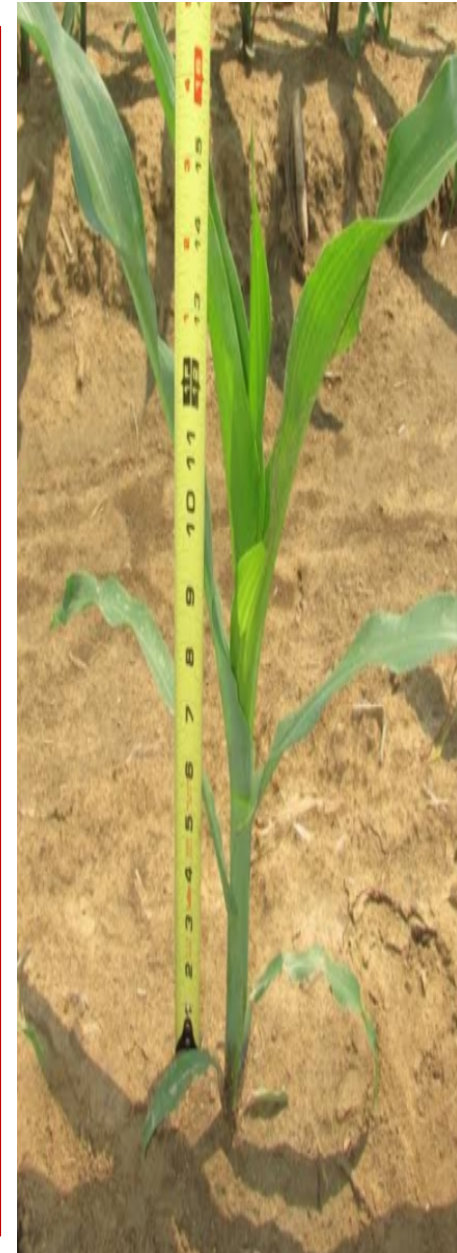

1. Afolayan, E.M.; Oluwafemi, F.A.; Jeff-Agboola, E.O.; Oluwasegun, T.; Ayankale, J.O. Socio-economic benefits of microgravity research. *Arid Zone Journal of Engineering, Technology and Environment (AZOJETE)*, Centre for Satellite Technology Development Special Issue: Space Science and Technology for Sustainable Development 2019, 15, SP.i2: 57-74, Print ISSN: 1596-2490, Electron vic ISSN: 2545-5818.
2. Oluwafemi, F.A.; De La Torre, A.; Afolayan, E.M.; Olalekan-Ajayi, B.M.; Dhital, B.; Mora-Almanza, J.G.; Potrivitu, G.; Creech, J.; Rivolta, A. Space food and nutrition in a long-term manned mission. *Adv. Astronaut. Sci. Technol.* 2018, 1, 1. Doi: 10.1007/s42423-018-0016-2.
3. Howard, G.L. The Influence of microgravity on plants. NASA Surface Systems Office, Space Life Sciences Laboratory, Mail Code NE-S-1, Kennedy Space Center, FL 32899. NASA ISS Research Academy and Pre-Application Meeting, South Shore Harbour Resort & Conference Center, League City, Texas, 2010.
4. Oluwafemi, F.A.; Ibraheem, O.; Fatoki, T.H. Clinostat microgravity impact on shoot morphology of selected nutritional and economic crops. *Plant Cell Biotechnol Mol Biol.* 2020, 21(43&44), 92-104. ISSN: 0972-2025.
5. Oluwafemi, F.A.; Olubiyi, R.A. Investigation of corn seeds growth under simulated microgravity. *Arid Zone Journal of Engineering, Technology and Environment (AZOJETE)*, Centre for Satellite Technology Development Special Issue: Space Science and Technology for Sustainable Development 2019, 15, SP.i2: 110-115, Print ISSN: 1596-2490, Electronic ISSN: 2545-5818.
6. Awika, M.J. Major cereal grains production and use around the world. ACS symposium series. 2011, 1089, pp. 1-13. DOI: 10.1021/bk-2011-1089.ch001.
7. United Nations. Teacher's guide to plant experiments in microgravity. Human Space Technology Initiative. United Nations Programme on Space Applications, Publishing and Library Section, United Nations Office, ST/SPACE/63, New York, 2013.

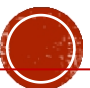

**THANKS FOR  
YOUR ACTIVE  
ATTENTION**

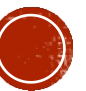

Supplement: s1 [file s1]
